# Supplementary material for: The Impact of the Honeybee Apis mellifera on the Organization of Pollination Networks Is Positively Related with Its Interactive Role throughout Its Geographic Range
Source: MDPI journal article supplement (doi:10.3390/d14110917), 2022-10-27
Supplement: s1 [file s1]

## Supplementary material

Table S1. List of plant-pollinator networks compiled in this study.

| network | latitude  | longitude | Reference                                                                                                                                                                                                                                                           |
|---------|-----------|-----------|---------------------------------------------------------------------------------------------------------------------------------------------------------------------------------------------------------------------------------------------------------------------|
| 1       | -7.92083  | -34.92083 | Lima, G., Leite, A., Souza, C., Castro, C., de Santana Bezerra, E. (2020). A multilayer network in an herbaceous tropical community reveals multiple roles of floral visitors. <i>Oikos</i> .                                                                       |
| 2       | -30.09222 | -51.67222 | Oleques, S., Vizentin-Bugoni, J., Overbeck, G. (2019). Influence of grazing intensity on patterns and structuring processes in plantpollinator networks in a subtropical grassland. <i>Arthropod-Plant Interactions</i> , 13(5), 757-770.                           |
| 3       | -30.09222 | -51.67222 | Oleques, S., Vizentin-Bugoni, J., Overbeck, G. (2019). Influence of grazing intensity on patterns and structuring processes in plantpollinator networks in a subtropical grassland. <i>Arthropod-Plant Interactions</i> , 13(5), 757-770.                           |
| 4       | -30.09222 | -51.67222 | Oleques, S., Vizentin-Bugoni, J., Overbeck, G. (2019). Influence of grazing intensity on patterns and structuring processes in plantpollinator networks in a subtropical grassland. <i>Arthropod-Plant Interactions</i> , 13(5), 757-770.                           |
| 5       | -30.09222 | -51.67222 | Oleques, S., Vizentin-Bugoni, J., Overbeck, G. (2019). Influence of grazing intensity on patterns and structuring processes in plantpollinator networks in a subtropical grassland. <i>Arthropod-Plant Interactions</i> , 13(5), 757-770.                           |
| 6       | -30.09222 | -51.67222 | Oleques, S., Vizentin-Bugoni, J., Overbeck, G. (2019). Influence of grazing intensity on patterns and structuring processes in plantpollinator networks in a subtropical grassland. <i>Arthropod-Plant Interactions</i> , 13(5), 757-770.                           |
| 7       | -30.09222 | -51.67222 | Oleques, S., Vizentin-Bugoni, J., Overbeck, G. (2019). Influence of grazing intensity on patterns and structuring processes in plantpollinator networks in a subtropical grassland. <i>Arthropod-Plant Interactions</i> , 13(5), 757-770.                           |
| 8       | -30.09222 | -51.67222 | Oleques, S., Vizentin-Bugoni, J., Overbeck, G. (2019). Influence of grazing intensity on patterns and structuring processes in plantpollinator networks in a subtropical grassland. <i>Arthropod-Plant Interactions</i> , 13(5), 757-770.                           |
| 9       | -30.09222 | -51.67222 | Oleques, S., Vizentin-Bugoni, J., Overbeck, G. (2019). Influence of grazing intensity on patterns and structuring processes in plantpollinator networks in a subtropical grassland. <i>Arthropod-Plant Interactions</i> , 13(5), 757-770.                           |
| 10      | -30.09222 | -51.67222 | Oleques, S., Vizentin-Bugoni, J., Overbeck, G. (2019). Influence of grazing intensity on patterns and structuring processes in plantpollinator networks in a subtropical grassland. <i>Arthropod-Plant Interactions</i> , 13(5), 757-770.                           |
| 11      | -30.09222 | -51.67222 | Oleques, S., Vizentin-Bugoni, J., Overbeck, G. (2019). Influence of grazing intensity on patterns and structuring processes in plantpollinator networks in a subtropical grassland. <i>Arthropod-Plant Interactions</i> , 13(5), 757-770.                           |
| 12      | -30.09222 | -51.67222 | Oleques, S., Vizentin-Bugoni, J., Overbeck, G. (2019). Influence of grazing intensity on patterns and structuring processes in plantpollinator networks in a subtropical grassland. <i>Arthropod-Plant Interactions</i> , 13(5), 757-770.                           |
| 13      | -30.09222 | -51.67222 | Oleques, S., Vizentin-Bugoni, J., Overbeck, G. (2019). Influence of grazing intensity on patterns and structuring processes in plantpollinator networks in a subtropical grassland. <i>Arthropod-Plant Interactions</i> , 13(5), 757-770.                           |
| 14      | -30.10704 | -51.09144 | Beal-Neves, M., Vogel Ely, C., Westerhofer Esteves, M., Blochtein, B., Lahm, R. A., Quadros, E. L., & Abreu Ferreira, P. M. (2020). The Influence of Urbanization and Fire Disturbance on Plant-floral Visitor Mutualistic Networks. <i>Diversity</i> , 12(4), 141. |
| 15      | -30.08898 | -51.09143 | Beal-Neves, M., Vogel Ely, C., Westerhofer Esteves, M., Blochtein, B., Lahm, R. A., Quadros, E. L., & Abreu Ferreira, P. M. (2020). The Influence of Urbanization and Fire Disturbance on Plant-floral Visitor Mutualistic Networks. <i>Diversity</i> , 12(4), 141. |
| 16      | -30.10304 | -51.23509 | Beal-Neves, M., Vogel Ely, C., Westerhofer Esteves, M., Blochtein, B., Lahm, R. A., Quadros, E. L., & Abreu Ferreira, P. M. (2020). The Influence of Urbanization and Fire Disturbance on Plant-floral Visitor Mutualistic Networks. <i>Diversity</i> , 12(4), 141. |
| 17      | -30.10458 | -51.23916 | Beal-Neves, M., Vogel Ely, C., Westerhofer Esteves, M., Blochtein, B., Lahm, R. A., Quadros, E. L., & Abreu Ferreira, P. M. (2020). The Influence of Urbanization and Fire Disturbance on Plant-floral Visitor Mutualistic Networks. <i>Diversity</i> , 12(4), 141. |
| 18      | -30.10524 | -51.24328 | Beal-Neves, M., Vogel Ely, C., Westerhofer Esteves, M., Blochtein, B., Lahm, R. A., Quadros, E. L., & Abreu Ferreira, P. M. (2020). The Influence of Urbanization and Fire Disturbance on Plant-floral Visitor Mutualistic Networks. <i>Diversity</i> , 12(4), 141. |
| 19      | -30.17021 | -51.11241 | Beal-Neves, M., Vogel Ely, C., Westerhofer Esteves, M., Blochtein, B., Lahm, R. A., Quadros, E. L., & Abreu Ferreira, P. M. (2020). The Influence of Urbanization and Fire Disturbance on Plant-floral Visitor Mutualistic Networks. <i>Diversity</i> , 12(4), 141. |

|    |           |           |                                                                                                                                                                                                                                                                                                                                                                |
|----|-----------|-----------|----------------------------------------------------------------------------------------------------------------------------------------------------------------------------------------------------------------------------------------------------------------------------------------------------------------------------------------------------------------|
| 20 | -30.16236 | -51.11332 | Beal-Neves, M., Vogel Ely, C., Westerhofer Esteves, M., Blochtein, B., Lahm, R. A., Quadros, E. L., & Abreu Ferreira, P. M. (2020). The Influence of Urbanization and Fire Disturbance on Plant-floral Visitor Mutualistic Networks. <i>Diversity</i> , 12(4), 141.                                                                                            |
| 21 | -30.15819 | -51.11624 | Beal-Neves, M., Vogel Ely, C., Westerhofer Esteves, M., Blochtein, B., Lahm, R. A., Quadros, E. L., & Abreu Ferreira, P. M. (2020). The Influence of Urbanization and Fire Disturbance on Plant-floral Visitor Mutualistic Networks. <i>Diversity</i> , 12(4), 141.                                                                                            |
| 22 | -30.35022 | -51.02771 | Beal-Neves, M., Vogel Ely, C., Westerhofer Esteves, M., Blochtein, B., Lahm, R. A., Quadros, E. L., & Abreu Ferreira, P. M. (2020). The Influence of Urbanization and Fire Disturbance on Plant-floral Visitor Mutualistic Networks. <i>Diversity</i> , 12(4), 141.                                                                                            |
| 23 | -30.33753 | -51.03851 | Beal-Neves, M., Vogel Ely, C., Westerhofer Esteves, M., Blochtein, B., Lahm, R. A., Quadros, E. L., & Abreu Ferreira, P. M. (2020). The Influence of Urbanization and Fire Disturbance on Plant-floral Visitor Mutualistic Networks. <i>Diversity</i> , 12(4), 141.)                                                                                           |
| 24 | -30.33957 | -51.03858 | Beal-Neves, M., Vogel Ely, C., Westerhofer Esteves, M., Blochtein, B., Lahm, R. A., Quadros, E. L., & Abreu Ferreira, P. M. (2020). The Influence of Urbanization and Fire Disturbance on Plant-floral Visitor Mutualistic Networks. <i>Diversity</i> , 12(4), 141.                                                                                            |
| 25 | 28.27083  | -16.63917 | Lara-Romero, C., Seguí, J., Pérez-Delgado, A., Nogales, M., & Traveset, A. (2019). Beta diversity and specialization in plant-pollinator networks along an elevational gradient. <i>Journal of Biogeography</i> , 46(7), 1598-1610.                                                                                                                            |
| 26 | 28.27083  | -16.63917 | Lara-Romero, C., Seguí, J., Pérez-Delgado, A., Nogales, M., & Traveset, A. (2019). Beta diversity and specialization in plant-pollinator networks along an elevational gradient. <i>Journal of Biogeography</i> , 46(7), 1598-1610.                                                                                                                            |
| 27 | 28.27083  | -16.63917 | Lara-Romero, C., Seguí, J., Pérez-Delgado, A., Nogales, M., & Traveset, A. (2019). Beta diversity and specialization in plant-pollinator networks along an elevational gradient. <i>Journal of Biogeography</i> , 46(7), 1598-1610.                                                                                                                            |
| 28 | 5.24132   | 10.97873  | Dicks, LV, Corbet, SA and Pywell, RF 2002. Compartmentalization in plant-insect flower visitor webs. <i>J. Anim. Ecol.</i> 71: 32-43                                                                                                                                                                                                                           |
| 29 | -29.61667 | 30.13333  | Ollerton, J., S. D. Johnson, L. Cranmer, and S. Kellie. 2003. The pollination ecology of an assemblage of grassland asclepiads in South Africa. <i>Annals of Botany</i> 92:807-834                                                                                                                                                                             |
| 30 | 51.57499  | -2.5899   | Memmmott J. 1999. The structure of a plant-pollinator food web. <i>Ecology Letters</i> 2:276-280.                                                                                                                                                                                                                                                              |
| 31 | -36.45    | 148.26667 | Inouye, D. W., and G. H. Pyke. 1988. Pollination biology in the Snowy Mountains of Australia: comparisons with montane Colorado, USA. <i>Australian Journal of Ecology</i> 13:191-210.                                                                                                                                                                         |
| 32 | 36.07539  | -79.00184 | Motten, A. F. 1982. Pollination Ecology of the Spring Wildflower Community in the Deciduous Forests of Piedmont North Carolina. Doctoral Dissertation thesis, Duke University, Durham, North Carolina, USA; Motten, A. F. 1986. Pollination ecology of the spring wildflower community of a temperate deciduous forest. <i>Ecological Monographs</i> 56:21-42. |
| 33 | 45.4      | -75.5     | Small, E. 1976. Insect pollinators of the Mer Bleue peat bog of Ottawa. <i>Canadian Field Naturalist</i> 90:22-28.                                                                                                                                                                                                                                             |
| 34 | 18.35389  | -77.64528 | Ingversen TT (2006). Plant-pollinator interactions on Jamaica and Dominica: The centrality, asymmetry and modularity of networks. Msc thesis (Univ of Aarhus, Aarhus, Denmark).                                                                                                                                                                                |
| 35 | 15.51889  | -61.46722 | Ingversen TT (2006). Plant-pollinator interactions on Jamaica and Dominica: The centrality, asymmetry and modularity of networks. Msc thesis (Univ of Aarhus, Aarhus, Denmark).                                                                                                                                                                                |
| 36 | 35.03333  | 135.78333 | Kakutani, T., T. Inoue, M. Kato and H. Ichihashi (1990) Insect-flower relationship in the campus of Kyoto University, Kyoto: An overview of the flowering phenology and the seasonal pattern of insect visits. Contribution from the Biological Laboratory, Kyoto University, 27: 465-521.                                                                     |
| 37 | 35.65     | 136.08333 | Kato & Miura (1996). Flowering phenology and anthophilous insect community at a threatened natural lowland marsh at Nakaikemi in Tsuruga, Japan. <i>Kyoto University</i> , Vol. 29: 1-48                                                                                                                                                                       |
| 38 | 42.2973   | 3.23522   | Bartomeus, I., Vilà, M. & Santamaria, L., 2008. Contrasting effects of invasive plants in plant-pollinator networks. <i>Oecologia</i> 155: 761-770                                                                                                                                                                                                             |
| 39 | -8.505    | -37.20139 | Bezerra ELS, Machado ICS, Mello MAR. 2009. Pollination networks of oil-flowers: a tiny world within the smallest of all worlds. <i>Journal of Animal Ecology</i> 78:1096-1101                                                                                                                                                                                  |
| 40 | -20.40075 | 57.4661   | Kaiser-Bunbury, C. N., S. Muff, J. Memmmott, C. B. Müller, and A. Cafisch. 2010. The robustness of pollination networks to the loss of species and interactions: A quantitative approach incorporating pollinator behaviour. <i>Ecology Letters</i> 13:442-452.                                                                                                |
| 41 | -20.40075 | 57.4661   | Kaiser-Bunbury, C. N., S. Muff, J. Memmmott, C. B. Müller, and A. Cafisch. 2010. The robustness of pollination networks to the loss of species and interactions: A                                                                                                                                                                                             |



|    |           |           |                                                                                                                                                                                                                                                                |
|----|-----------|-----------|----------------------------------------------------------------------------------------------------------------------------------------------------------------------------------------------------------------------------------------------------------------|
|    |           |           | quantitative approach incorporating pollinator behaviour. <i>Ecology Letters</i> 13:442-452.                                                                                                                                                                   |
| 58 | -20.40075 | 57.4661   | Kaiser-Bunbury, C. N., S. Muff, J. Memmott, C. B. Müller, and A. Cafisch. 2010. The robustness of pollination networks to the loss of species and interactions: A quantitative approach incorporating pollinator behaviour. <i>Ecology Letters</i> 13:442-452. |
| 59 | -20.40075 | 57.4661   | Kaiser-Bunbury, C. N., S. Muff, J. Memmott, C. B. Müller, and A. Cafisch. 2010. The robustness of pollination networks to the loss of species and interactions: A quantitative approach incorporating pollinator behaviour. <i>Ecology Letters</i> 13:442-452. |
| 60 | -4.66667  | 55.43333  | Kaiser-Bunbury CN, Vázquez DP, Stang M, Ghazoul J. 2014. Determinants of the microstructure of plant-pollinator networks. <i>Ecology</i> , 95: 3314-3324.                                                                                                      |
| 61 | -4.66667  | 55.43333  | Kaiser-Bunbury CN, Vázquez DP, Stang M, Ghazoul J. 2014. Determinants of the microstructure of plant-pollinator networks. <i>Ecology</i> , 95: 3314-3324.                                                                                                      |
| 62 | -4.66667  | 55.43333  | Kaiser-Bunbury CN, Vázquez DP, Stang M, Ghazoul J. 2014. Determinants of the microstructure of plant-pollinator networks. <i>Ecology</i> , 95: 3314-3324.                                                                                                      |
| 63 | -4.66667  | 55.43333  | Kaiser-Bunbury CN, Vázquez DP, Stang M, Ghazoul J. 2014. Determinants of the microstructure of plant-pollinator networks. <i>Ecology</i> , 95: 3314-3324.                                                                                                      |
| 64 | -4.66667  | 55.43333  | Kaiser-Bunbury CN, Vázquez DP, Stang M, Ghazoul J. 2014. Determinants of the microstructure of plant-pollinator networks. <i>Ecology</i> , 95: 3314-3324.                                                                                                      |
| 65 | -4.66667  | 55.43333  | Kaiser-Bunbury CN, Vázquez DP, Stang M, Ghazoul J. 2014. Determinants of the microstructure of plant-pollinator networks. <i>Ecology</i> , 95: 3314-3324.                                                                                                      |
| 66 | -4.66667  | 55.43333  | Kaiser-Bunbury CN, Vázquez DP, Stang M, Ghazoul J. 2014. Determinants of the microstructure of plant-pollinator networks. <i>Ecology</i> , 95: 3314-3324.                                                                                                      |
| 67 | -4.66667  | 55.43333  | Kaiser-Bunbury CN, Vázquez DP, Stang M, Ghazoul J. 2014. Determinants of the microstructure of plant-pollinator networks. <i>Ecology</i> , 95: 3314-3324.                                                                                                      |
| 68 | -4.66667  | 55.43333  | Kaiser-Bunbury CN, Vázquez DP, Stang M, Ghazoul J. 2014. Determinants of the microstructure of plant-pollinator networks. <i>Ecology</i> , 95: 3314-3324.                                                                                                      |
| 69 | -4.66667  | 55.43333  | Kaiser-Bunbury CN, Vázquez DP, Stang M, Ghazoul J. 2014. Determinants of the microstructure of plant-pollinator networks. <i>Ecology</i> , 95: 3314-3324.                                                                                                      |
| 70 | 27.95861  | -15.5925  | Trøjelsgaard, K., Jordano, P., Carstensen, D. W., & Olesen, J. M. (2015). Geographical variation in mutualistic networks: similarity, turnover and partner fidelity. <i>Proc. R. Soc. B</i> , 282(1802), 20142925.                                             |
| 71 | 27.95861  | -15.5925  | Trøjelsgaard, K., Jordano, P., Carstensen, D. W., & Olesen, J. M. (2015). Geographical variation in mutualistic networks: similarity, turnover and partner fidelity. <i>Proc. R. Soc. B</i> , 282(1802), 20142925.                                             |
| 72 | 28.26861  | -16.60556 | Trøjelsgaard, K., Jordano, P., Carstensen, D. W., & Olesen, J. M. (2015). Geographical variation in mutualistic networks: similarity, turnover and partner fidelity. <i>Proc. R. Soc. B</i> , 282(1802), 20142925.                                             |
| 73 | 47.5529   | 12.88416  | Benadi, G., Hovestadt, T., Poethke, H. J., & Blüthgen, N. (2014). Specialization and phenological synchrony of plant-pollinator interactions along an altitudinal gradient. <i>Journal of Animal Ecology</i> , 83(3), 639-650.                                 |
| 74 | 47.53625  | 12.88638  | Benadi, G., Hovestadt, T., Poethke, H. J., & Blüthgen, N. (2014). Specialization and phenological synchrony of plant-pollinator interactions along an altitudinal gradient. <i>Journal of Animal Ecology</i> , 83(3), 639-650.                                 |
| 75 | 47.5271   | 12.90783  | Benadi, G., Hovestadt, T., Poethke, H. J., & Blüthgen, N. (2014). Specialization and phenological synchrony of plant-pollinator interactions along an altitudinal gradient. <i>Journal of Animal Ecology</i> , 83(3), 639-650.                                 |
| 76 | 28.26861  | -16.60556 | Trøjelsgaard, K., Jordano, P., Carstensen, D. W., & Olesen, J. M. (2015). Geographical variation in mutualistic networks: similarity, turnover and partner fidelity. <i>Proc. R. Soc. B</i> , 282(1802), 20142925.                                             |
| 77 | 28.26861  | -16.60556 | Trøjelsgaard, K., Jordano, P., Carstensen, D. W., & Olesen, J. M. (2015). Geographical variation in mutualistic networks: similarity, turnover and partner fidelity. <i>Proc. R. Soc. B</i> , 282(1802), 20142925.                                             |
| 78 | 0.28333   | 34.9      | Hagen, M., & Kraemer, M. (2010). Agricultural surroundings support flower-visitor networks in an Afrotropical rain forest. <i>Biological Conservation</i> , 143(7), 1654-1663.                                                                                 |
| 79 | 28.1      | -17.13333 | Carstensen, D. W., Trøjelsgaard, K., Ollerton, J., & Morellato, L. P. C. (2018). Local and regional specialization in plant-pollinator networks. <i>Oikos</i> , 127(4), 531-537.                                                                               |
| 80 | 27.95861  | -15.5925  | Carstensen, D. W., Trøjelsgaard, K., Ollerton, J., & Morellato, L. P. C. (2018). Local and regional specialization in plant-pollinator networks. <i>Oikos</i> , 127(4), 531-537.                                                                               |
| 81 | 28.26861  | -16.60556 | Carstensen, D. W., Trøjelsgaard, K., Ollerton, J., & Morellato, L. P. C. (2018). Local and regional specialization in plant-pollinator networks. <i>Oikos</i> , 127(4), 531-537.                                                                               |
| 82 | -19.34167 | -43.60611 | Carstensen, D. W., Trøjelsgaard, K., Ollerton, J., & Morellato, L. P. C. (2018). Local and regional specialization in plant-pollinator networks. <i>Oikos</i> , 127(4), 531-537.                                                                               |

|     |             |           |                                                                                                                                                                                                                                                                                                                                                                |
|-----|-------------|-----------|----------------------------------------------------------------------------------------------------------------------------------------------------------------------------------------------------------------------------------------------------------------------------------------------------------------------------------------------------------------|
| 83  | -19.34167   | -43.60611 | Carstensen, D. W., Trøjelsgaard, K., Ollerton, J., & Morellato, L. P. C. (2018). Local and regional specialization in plant–pollinator networks. <i>Oikos</i> , 127(4), 531–537.                                                                                                                                                                               |
| 84  | 0.28333     | 34.9      | Hagen, M., & Kraemer, M. (2010). Agricultural surroundings support flower–visitor networks in an Afrotropical rain forest. <i>Biological Conservation</i> , 143(7), 1654–1663.                                                                                                                                                                                 |
| 85  | -19.34167   | -43.60611 | Carstensen, D. W., Trøjelsgaard, K., Ollerton, J., & Morellato, L. P. C. (2018). Local and regional specialization in plant–pollinator networks. <i>Oikos</i> , 127(4), 531–537.                                                                                                                                                                               |
| 86  | -18.28056   | -52.04806 | Souza, C. S., Maruyama, P. K., Aoki, C., Sigrist, M. R., Raizer, J., Gross, C. L., & de Araujo, A. C. (2018). Temporal variation in plant–pollinator networks from seasonal tropical environments: higher specialization when resources are scarce. <i>Journal of Ecology</i> , 106(6), 2409–2420.                                                             |
| 87  | -19.58118   | -57.03967 | Souza, C. S., Maruyama, P. K., Aoki, C., Sigrist, M. R., Raizer, J., Gross, C. L., & de Araujo, A. C. (2018). Temporal variation in plant–pollinator networks from seasonal tropical environments: higher specialization when resources are scarce. <i>Journal of Ecology</i> , 106(6), 2409–2420.                                                             |
| 88  | -21.70111   | -57.885   | Souza, C. S., Maruyama, P. K., Aoki, C., Sigrist, M. R., Raizer, J., Gross, C. L., & de Araujo, A. C. (2018). Temporal variation in plant–pollinator networks from seasonal tropical environments: higher specialization when resources are scarce. <i>Journal of Ecology</i> , 106(6), 2409–2420.                                                             |
| 89  | -20.544     | -54.39833 | Souza, C. S., Maruyama, P. K., Aoki, C., Sigrist, M. R., Raizer, J., Gross, C. L., & de Araujo, A. C. (2018). Temporal variation in plant–pollinator networks from seasonal tropical environments: higher specialization when resources are scarce. <i>Journal of Ecology</i> , 106(6), 2409–2420.                                                             |
| 90  | 0.28333     | 34.9      | Hagen, M., & Kraemer, M. (2010). Agricultural surroundings support flower–visitor networks in an Afrotropical rain forest. <i>Biological Conservation</i> , 143(7), 1654–1663.                                                                                                                                                                                 |
| 91  | 39.94436    | 4.25016   | Montero-Castaño, A., & Vilà, M. (2017). Influence of the honeybee and trait similarity on the effect of a non-native plant on pollination and network rewiring. <i>Functional ecology</i> , 31(1), 142–152.                                                                                                                                                    |
| 92  | 28.1        | -17.13333 | Trøjelsgaard K, Jordano P, Carstensen DW, Olesen JM. 2015 Geographical variation in mutualistic networks: similarity, turnover and partner fidelity. <i>Proc. R. Soc. B</i> 282: 20142925.                                                                                                                                                                     |
| 93  | 28.1        | -17.13333 | Trøjelsgaard K, Jordano P, Carstensen DW, Olesen JM. 2015 Geographical variation in mutualistic networks: similarity, turnover and partner fidelity. <i>Proc. R. Soc. B</i> 282: 20142925.                                                                                                                                                                     |
| 94  | -19.34167   | -43.60611 | Carstensen, D. W., Trøjelsgaard, K., Ollerton, J., & Morellato, L. P. C. (2018). Local and regional specialization in plant–pollinator networks. <i>Oikos</i> , 127(4), 531–537.                                                                                                                                                                               |
| 95  | -19.34167   | -43.60611 | Carstensen, D. W., Trøjelsgaard, K., Ollerton, J., & Morellato, L. P. C. (2018). Local and regional specialization in plant–pollinator networks. <i>Oikos</i> , 127(4), 531–537.                                                                                                                                                                               |
| 96  | 27.83333333 | 99.7      | Zhao, Y. H., Memmott, J., Vaughan, I. P., Li, H. D., Ren, Z. X., Lázaro, A., ... & Wang, H. (2021). The impact of a native dominant plant, <i>Euphorbia jolkin ii</i> , on plant–flower visitor networks and pollen deposition on stigmas of co-flowering species in subalpine meadows of Shangri-La, SW China. <i>Journal of Ecology</i> , 109(5), 2107–2120. |
| 97  | 27.83333333 | 99.7      | Zhao, Y. H., Memmott, J., Vaughan, I. P., Li, H. D., Ren, Z. X., Lázaro, A., ... & Wang, H. (2021). The impact of a native dominant plant, <i>Euphorbia jolkin ii</i> , on plant–flower visitor networks and pollen deposition on stigmas of co-flowering species in subalpine meadows of Shangri-La, SW China. <i>Journal of Ecology</i> , 109(5), 2107–2120. |
| 98  | 27.83333333 | 99.7      | Zhao, Y. H., Memmott, J., Vaughan, I. P., Li, H. D., Ren, Z. X., Lázaro, A., ... & Wang, H. (2021). The impact of a native dominant plant, <i>Euphorbia jolkin ii</i> , on plant–flower visitor networks and pollen deposition on stigmas of co-flowering species in subalpine meadows of Shangri-La, SW China. <i>Journal of Ecology</i> , 109(5), 2107–2120. |
| 99  | 27.83333333 | 99.7      | Zhao, Y. H., Memmott, J., Vaughan, I. P., Li, H. D., Ren, Z. X., Lázaro, A., ... & Wang, H. (2021). The impact of a native dominant plant, <i>Euphorbia jolkin ii</i> , on plant–flower visitor networks and pollen deposition on stigmas of co-flowering species in subalpine meadows of Shangri-La, SW China. <i>Journal of Ecology</i> , 109(5), 2107–2120. |
| 100 | 27.83333333 | 99.7      | Zhao, Y. H., Memmott, J., Vaughan, I. P., Li, H. D., Ren, Z. X., Lázaro, A., ... & Wang, H. (2021). The impact of a native dominant plant, <i>Euphorbia jolkin ii</i> , on plant–flower visitor networks and pollen deposition on stigmas of co-flowering species in subalpine meadows of Shangri-La, SW China. <i>Journal of Ecology</i> , 109(5), 2107–2120. |
| 101 | 27.83333333 | 99.7      | Zhao, Y. H., Memmott, J., Vaughan, I. P., Li, H. D., Ren, Z. X., Lázaro, A., ... & Wang, H. (2021). The impact of a native dominant plant, <i>Euphorbia jolkin ii</i> , on plant–flower visitor networks and pollen deposition on stigmas of co-flowering                                                                                                      |

|     |             |         |                                                                                                                                                                                                                                                                                                                                                                |
|-----|-------------|---------|----------------------------------------------------------------------------------------------------------------------------------------------------------------------------------------------------------------------------------------------------------------------------------------------------------------------------------------------------------------|
|     |             |         | species in subalpine meadows of Shangri-La, SW China. <i>Journal of Ecology</i> , 109(5), 2107-2120.                                                                                                                                                                                                                                                           |
| 102 | 27.83333333 | 99.7    | Zhao, Y. H., Memmott, J., Vaughan, I. P., Li, H. D., Ren, Z. X., Lázaro, A., ... & Wang, H. (2021). The impact of a native dominant plant, <i>Euphorbia jolkin ii</i> , on plant-flower visitor networks and pollen deposition on stigmas of co-flowering species in subalpine meadows of Shangri-La, SW China. <i>Journal of Ecology</i> , 109(5), 2107-2120. |
| 103 | 27.83333333 | 99.7    | Zhao, Y. H., Memmott, J., Vaughan, I. P., Li, H. D., Ren, Z. X., Lázaro, A., ... & Wang, H. (2021). The impact of a native dominant plant, <i>Euphorbia jolkin ii</i> , on plant-flower visitor networks and pollen deposition on stigmas of co-flowering species in subalpine meadows of Shangri-La, SW China. <i>Journal of Ecology</i> , 109(5), 2107-2120. |
| 104 | 27.83333333 | 99.7    | Zhao, Y. H., Memmott, J., Vaughan, I. P., Li, H. D., Ren, Z. X., Lázaro, A., ... & Wang, H. (2021). The impact of a native dominant plant, <i>Euphorbia jolkin ii</i> , on plant-flower visitor networks and pollen deposition on stigmas of co-flowering species in subalpine meadows of Shangri-La, SW China. <i>Journal of Ecology</i> , 109(5), 2107-2120. |
| 105 | 27.83333333 | 99.7    | Zhao, Y. H., Memmott, J., Vaughan, I. P., Li, H. D., Ren, Z. X., Lázaro, A., ... & Wang, H. (2021). The impact of a native dominant plant, <i>Euphorbia jolkin ii</i> , on plant-flower visitor networks and pollen deposition on stigmas of co-flowering species in subalpine meadows of Shangri-La, SW China. <i>Journal of Ecology</i> , 109(5), 2107-2120. |
| 106 | 27.83333333 | 99.7    | Zhao, Y. H., Memmott, J., Vaughan, I. P., Li, H. D., Ren, Z. X., Lázaro, A., ... & Wang, H. (2021). The impact of a native dominant plant, <i>Euphorbia jolkin ii</i> , on plant-flower visitor networks and pollen deposition on stigmas of co-flowering species in subalpine meadows of Shangri-La, SW China. <i>Journal of Ecology</i> , 109(5), 2107-2120. |
| 107 | 27.83333333 | 99.7    | Zhao, Y. H., Memmott, J., Vaughan, I. P., Li, H. D., Ren, Z. X., Lázaro, A., ... & Wang, H. (2021). The impact of a native dominant plant, <i>Euphorbia jolkin ii</i> , on plant-flower visitor networks and pollen deposition on stigmas of co-flowering species in subalpine meadows of Shangri-La, SW China. <i>Journal of Ecology</i> , 109(5), 2107-2120. |
| 108 | 58.5801     | 23.5580 | Motivans Švara, E., Ștefan, V., Sossai, E., Feldmann, R., Aguilon, D. J., Bontsutsnaja, A., ... & Neuenkamp, L. (2021). Effects of different types of low-intensity management on plant-pollinator interactions in Estonian grasslands. <i>Ecology and evolution</i> , 11(23), 16909-16926.                                                                    |
| 109 | 58.7169     | 23.7718 | Motivans Švara, E., Ștefan, V., Sossai, E., Feldmann, R., Aguilon, D. J., Bontsutsnaja, A., ... & Neuenkamp, L. (2021). Effects of different types of low-intensity management on plant-pollinator interactions in Estonian grasslands. <i>Ecology and evolution</i> , 11(23), 16909-16926.                                                                    |

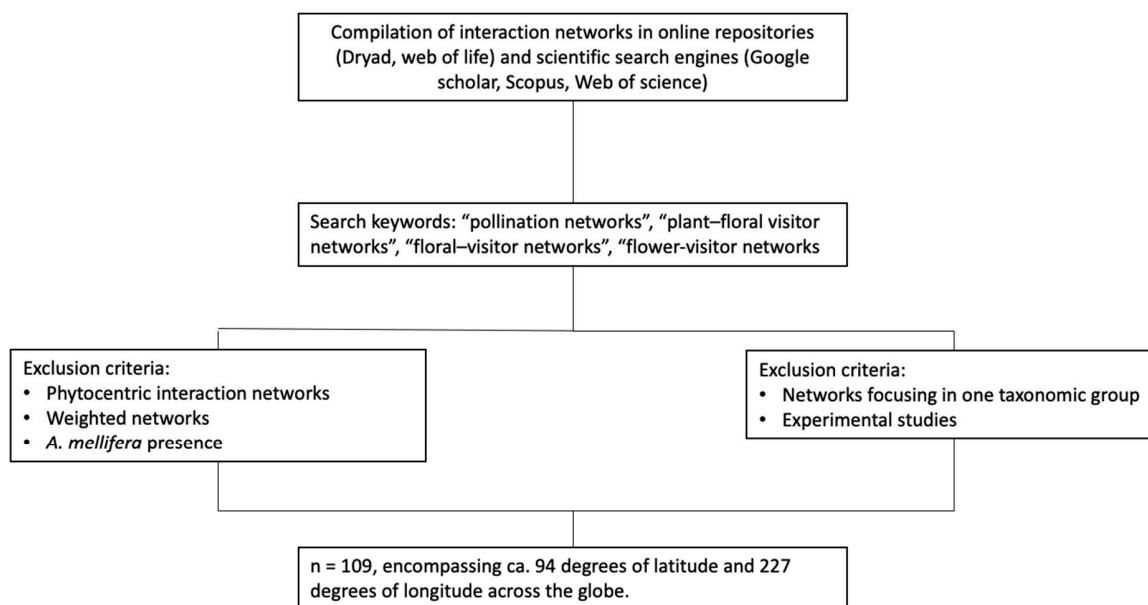

**Figure S1.** Flow diagram showing how the interaction networks search was done and what were the exclusion and inclusion criteria of this study.

**File S1.** Detailed information on the indices used to measure species centrality.

Species degree is the number of direct links of each species to other species and, therefore, species with higher number of links are more central than species with lower number of links (Borrett 2013).

Borrett, S. R. (2013). Throughflow centrality is a global indicator of the functional importance of species in ecosystems. *Ecological Indicators*, 32, 182-196.

**Betweenness**( $i$ ) =  $\sum_{s \neq i \neq t \in i} \frac{\sigma_{st}(i)}{\sigma_{st}}$ , where  $\sigma_{st}$  is total number of shortest paths from node  $s$  to node  $t$  and  $\sigma_{st}(i)$  is the number of those paths that pass through  $i$ . Specifically, betweenness centrality quantifies the number of times a node acts as a bridge along the shortest path between two other nodes (Brandes 2008).

Brandes, U. (2008). On Variants of Shortest-Path Betweenness Centrality and their Generic Computation. *Social Networks*, 30, 136–145.

**Species strength** ( $i$ ) =  $d_{ji}^P$  depicts the strength or dependence of the plant species  $i$  on the bee species  $j$  (i.e., the fraction of all bee visits accounted for by this particular bee species). Based on these dependences, we estimated species strength, which is the sum of dependencies of each species across all of its partners (counterpart). Specifically, species strength represents a quantitative extension of species degree, in which species with greater strength will represent proportionally higher visitation (Bascompte and Jordano, 2007).

Bascompte, J., & Jordano, P. (2007). Plant-animal mutualistic networks: the architecture of biodiversity. *Annual Review of Ecology, Evolution, and Systematics*, 567-593.



**Katz centrality** ( $i$ )  $= x_i = \alpha \sum_j a_{ij} x_j + \beta$ , where  $A$  is the adjacency matrix of the graph  $G$  with eigenvalues  $\lambda$ . The parameter  $\beta$  controls the initial centrality and  $\alpha < \frac{1}{\lambda_{max}}$ . Specifically, it computes the centrality for a node based on the centrality of its immediate neighbors (direct paths) and also all other nodes in the network that connect to the node under consideration through these immediate neighbors (indirect paths) (Katz 1953).

Katz, L. (1953). A new status index derived from sociometric analysis. *Psychometrika*, 18: 39–43.

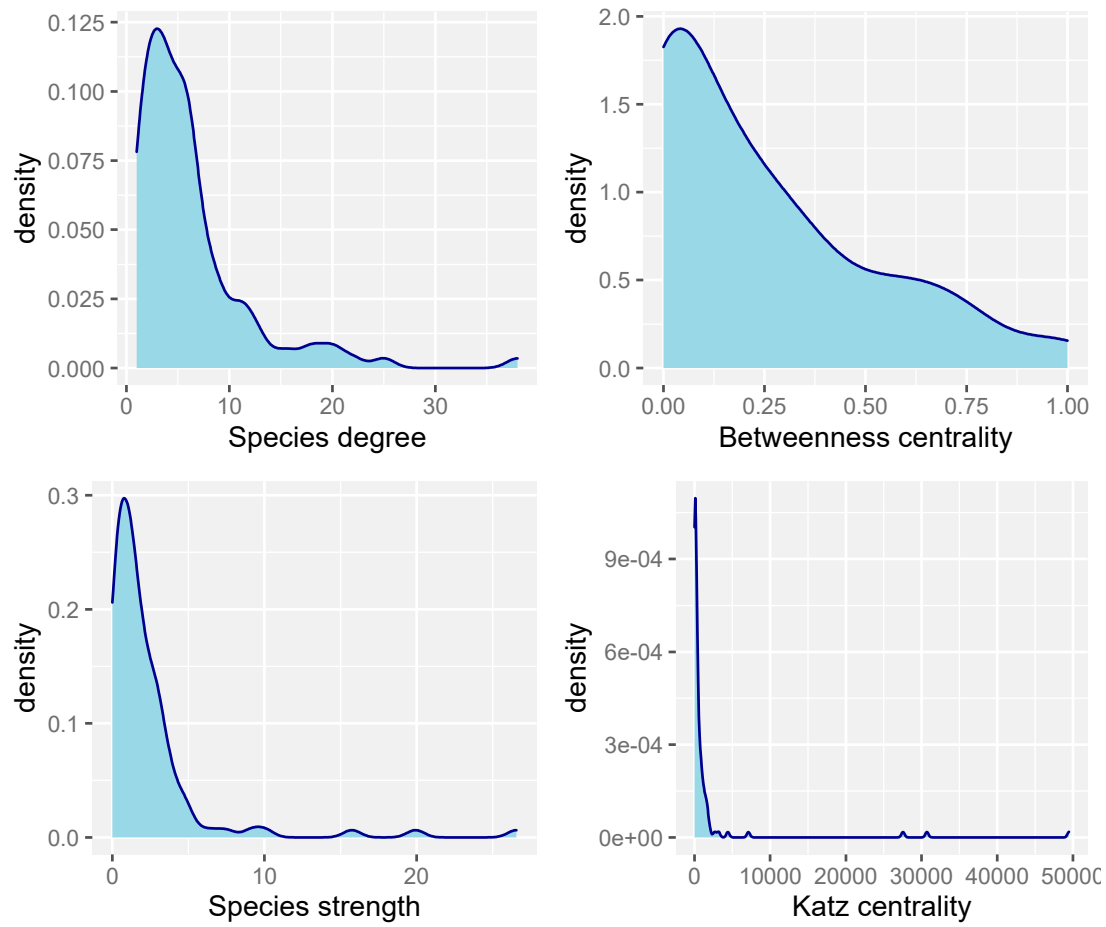

**Figure S2.** Density plots showing the distribution in the values of species degree, betweenness centrality, species strength, and Katz centrality.

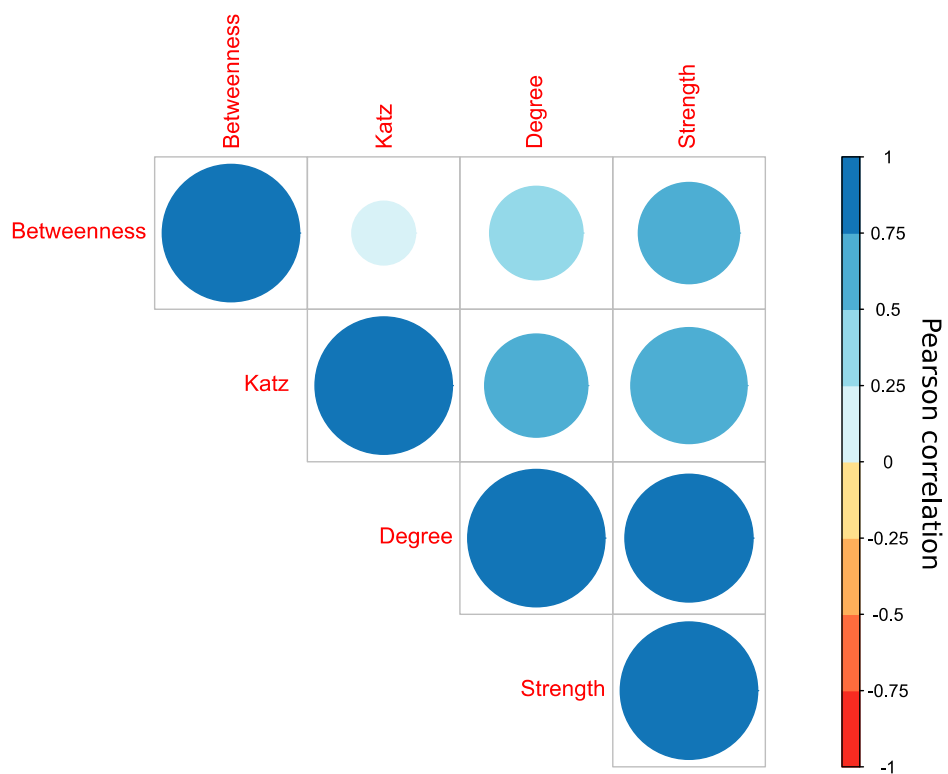

**Figure S3.** Correlation coefficients between each species-level descriptor used to measure the interactive role of *Apis mellifera*. Dark blue and bigger circles indicate a strong and positive correlation between centrality metrics, while dark red and bigger circles indicate a strong and negative correlation between centrality metrics.

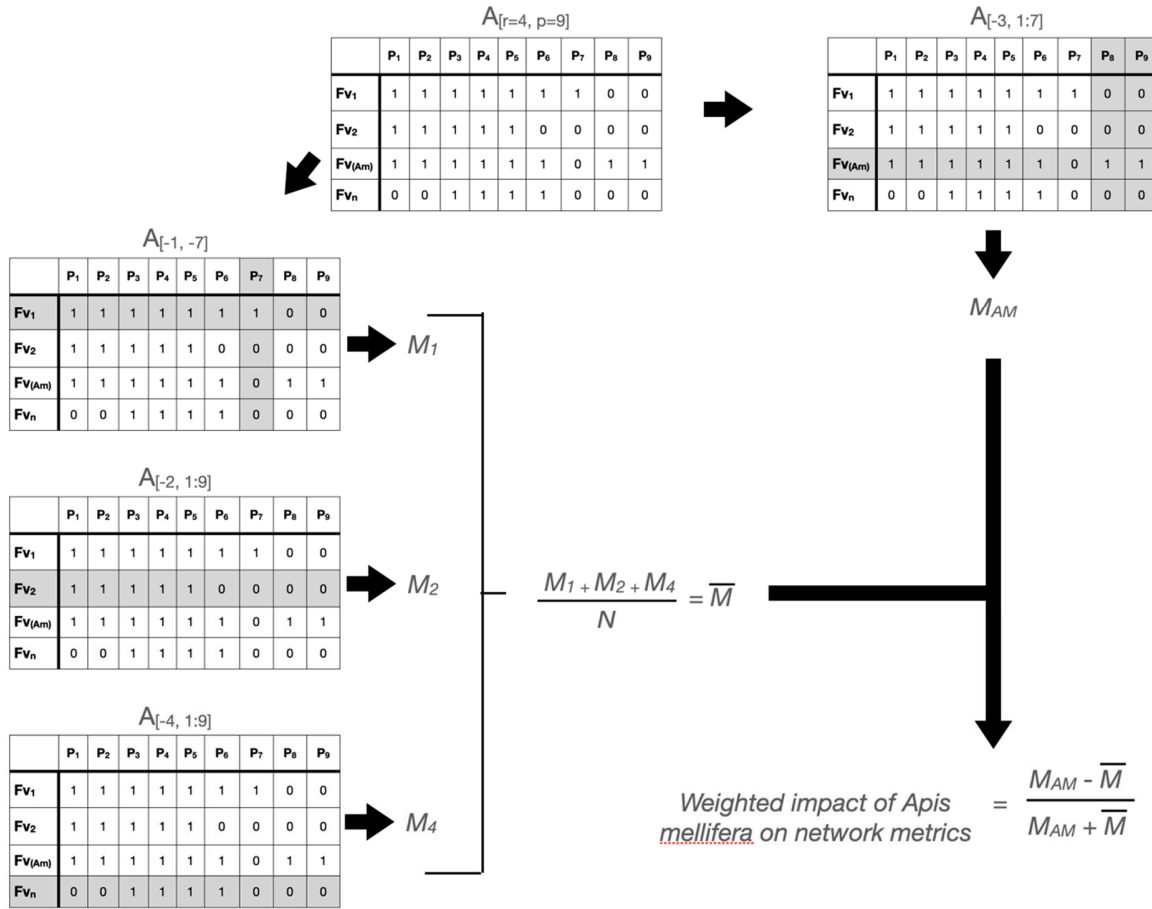

**Figure S4** Schematic diagram of the calculation of the weighted impact of *Apis mellifera* on network metrics.  $A$  represent the original matrix network representation of a given site with  $v$  (4) floral visitor and  $p$  (9) plant species.  $A_{[i,j]}$  represent matrixes where one row (floral visitor) is deleted (grey shadow) together with those columns (plants) that exclusively interacted with the deleted row. The specific case when *A. mellifera* was removed is shown in the upper right section of the diagram.  $M_i$  represent network metric value based on  $A$  with  $v-1$  floral visitor species,  $N$  is the number of metric values based on  $A$  with  $v-1$  floral visitor species but all including *A. mellifera*, while  $M_{Am}$  is the metric estimate when *A. mellifera* was excluded.  $\bar{M}$  is the average of metric values based on  $A$  with  $v-1$  floral visitor species but all including *A. mellifera*.

Positive subindex indicate row/columns included, subindex speared by colon represent sequence on integers, and negative subindex indicate rows/columns excluded. For each network,  $N = r-1$ .

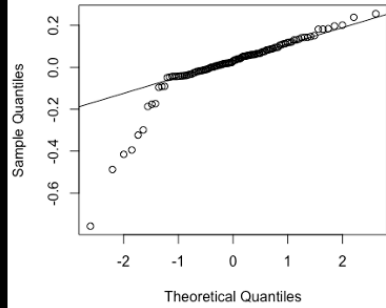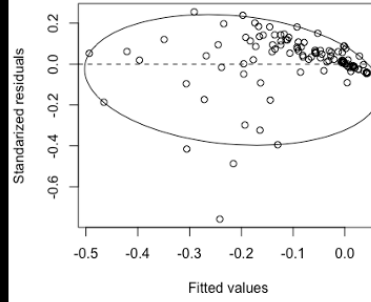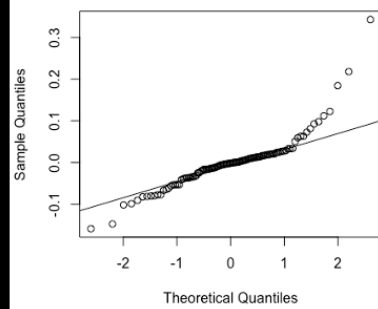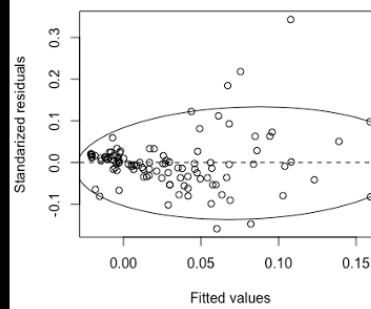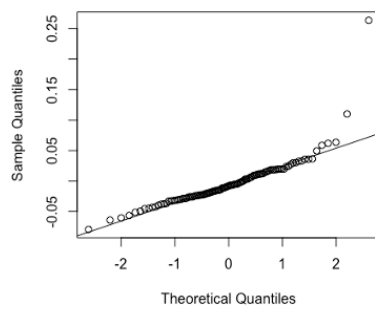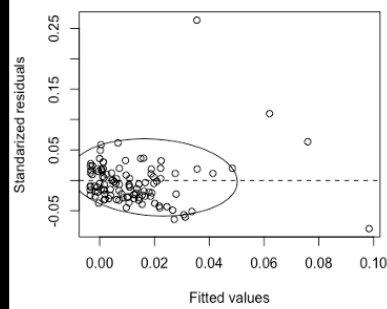

**Figure S5.** Behavior of residuals of fitted GAMM models (A: Plants' niche overlap – *NO*; B) Specialiation -  $H_2'$ ; C) Robustness to species extinction - *R*. Ellipses enclosed 95% of the residuals.
